# Supplementary material
Source: PubMed Central journal article supplement (PMC3265888)
Supplement: supp_M111.323303_jbc.M111.323303-1.pdf [file supp_M111.323303_jbc.M111.323303-1.pdf]

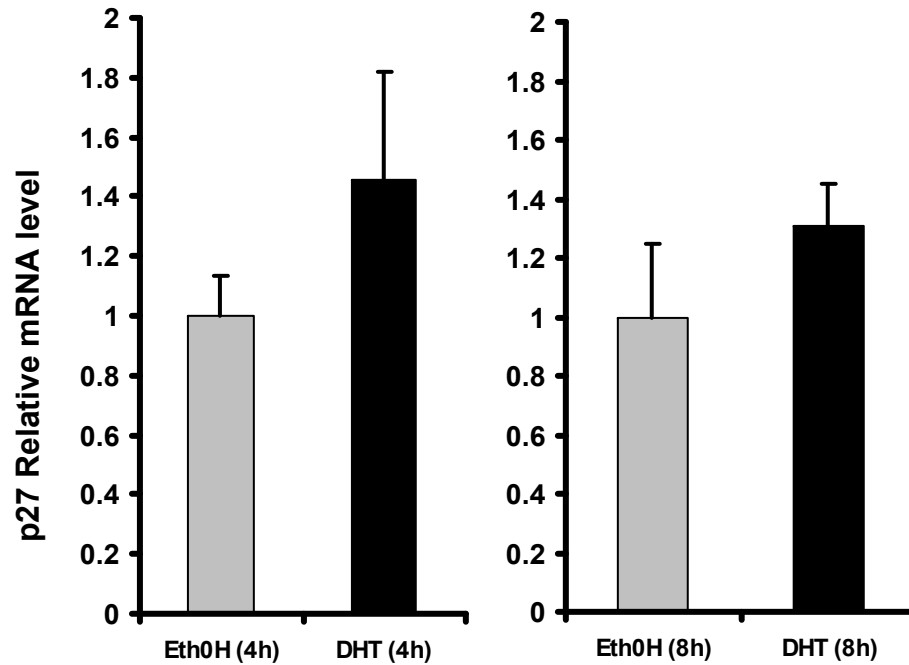

**Figure S1. The DHT does not significantly affect p27 mRNA levels.** CWR22R3 cells were cultured in CDS-serum medium and treated with 10nM DHT or carrier ethanol (EthOH) for the indicated time. The total RNAs were collected and p27 message level was measured by real time RT-PCR and presented as relative level compared to carrier treatment. Error bar, mean±SEM (n=3).

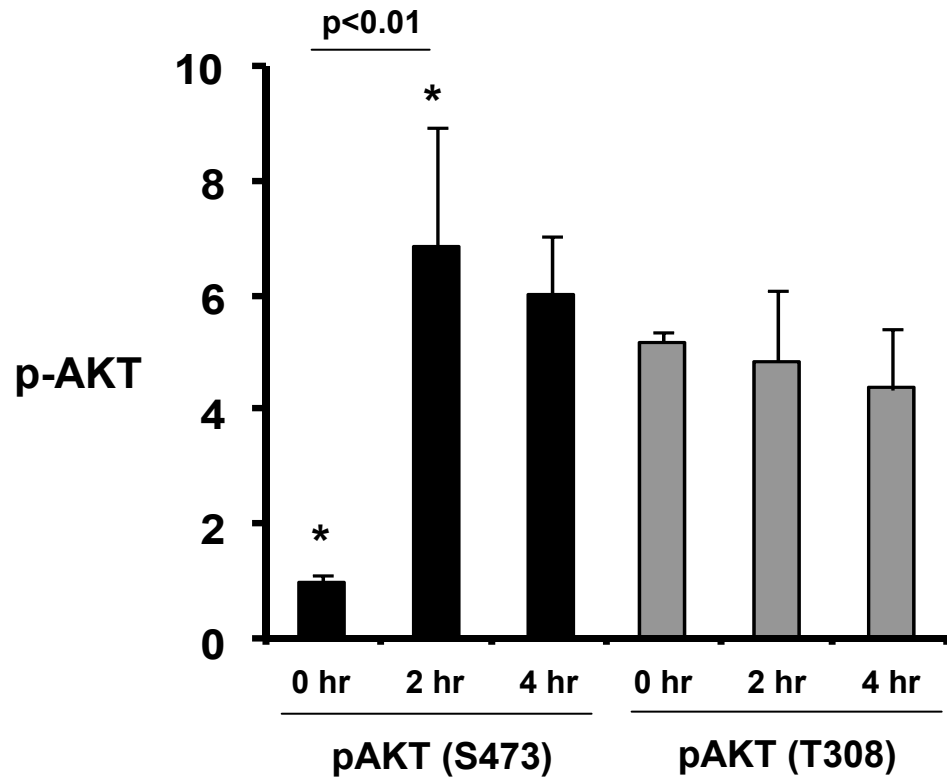

**Figure S2. DHT stimulated AKT S473 phosphorylation.**

CWR22R3 cells cultured in CDS-serum medium were treated with 10 nM of DHT for the indicated time period and blotted for phospho-S473, -T308 and total AKT. The immunoblot bands were quantified by ImageJ and normalized against total AKT; (n=3). (\*: Student T test, p<0.01). A rabbit polyclonal phospho-AKT (T308) was used.

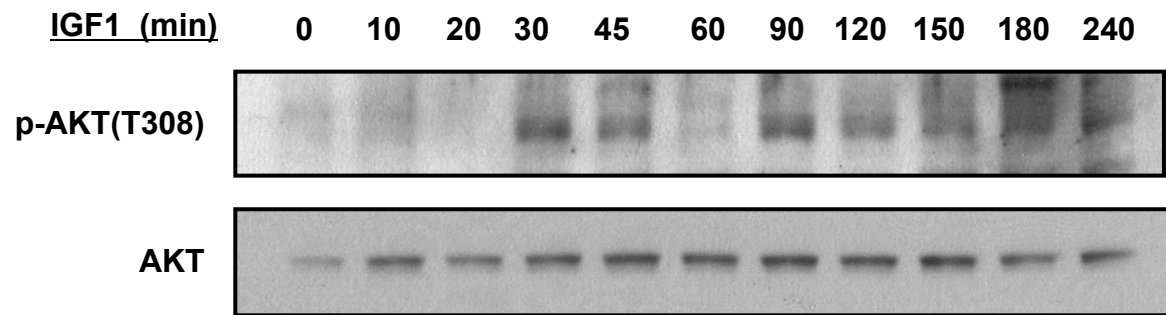

**Figure S3. IGF1 stimulates AKT T308 phosphorylation.** CWR22R3 cells cultured in CDS medium were treated with 20 ng/ml of IGF1 for the indicated time and blotted for phospho-T308 and total AKT. A rabbit polyclonal phospho-AKT (T308) was used.

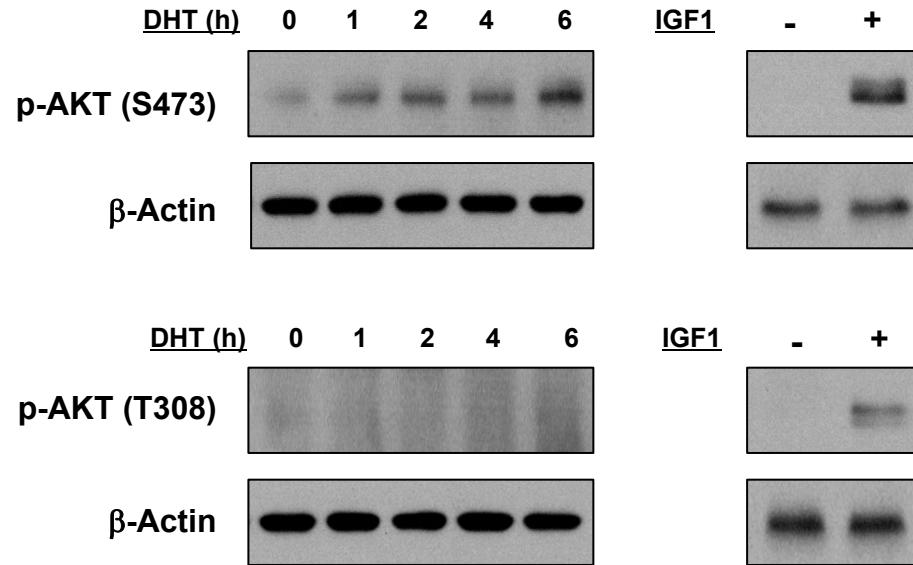

**Figure S4. DHT induced AKT S473 phosphorylation.** CWR22R3 cells were cultured in serum-free medium for 24 hours, followed by treatments with 10nM DHT from 0-6 hours; or by treatments with 20ng/ml IGF1 for 0 (-) or 15 (+) minutes. A rabbit monoclonal phospho-AKT (T308) was used for T308 phosphorylation. The β-Actin was blotted for protein loading control.

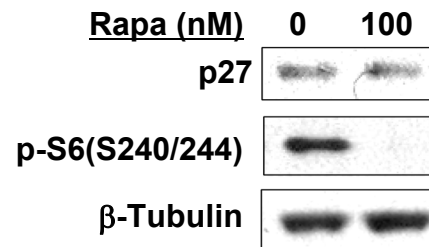

**Figure S5 Rapamycin does not affect basal p27 levels.** CWR22R3 cells were treated with rapamycin at the indicated dose for 8 hours and p27 and p-S6 were blotted.

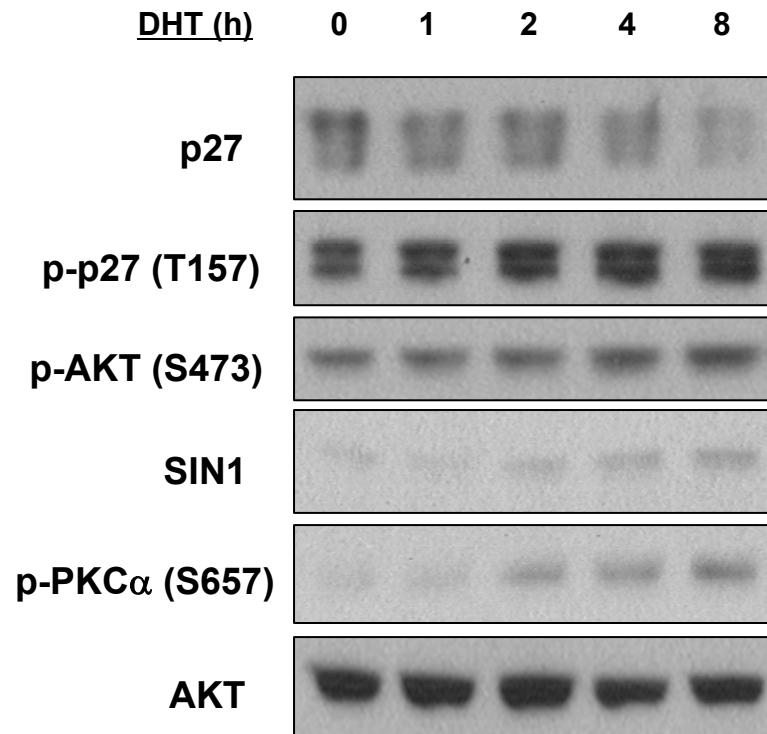

**Figure S6. DHT induced TORC2 activation and p27 degradation in LNCaP cells.** LNCaP cells cultured in medium with CDS serum for 72 hours were treated with DHT (10 nM) for 0 to 8 hours and the cell lysates were immunoblotted. Total AKT was blotted for protein loading control.

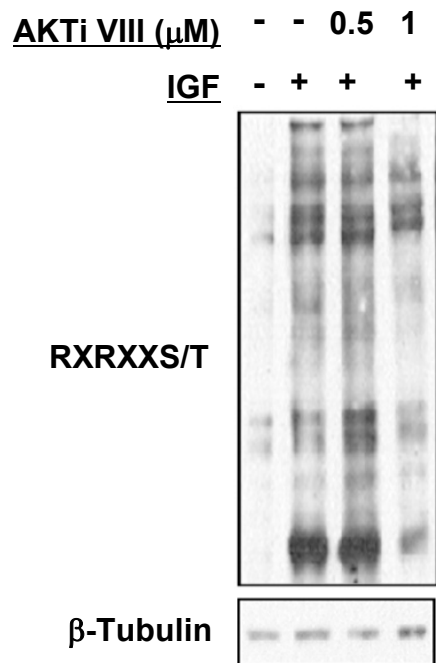

**Figure S7. A dose-dependent suppression of AKT activity by an AKT inhibitor (AKTi VIII).** CWR22R3 cells were treated with AKT inhibitor (AKTi VIII) for 2 hours at indicated concentrations. At the end of incubation, the cells were pulsed with IGF1 (20 ng/ml) for 15 minutes.

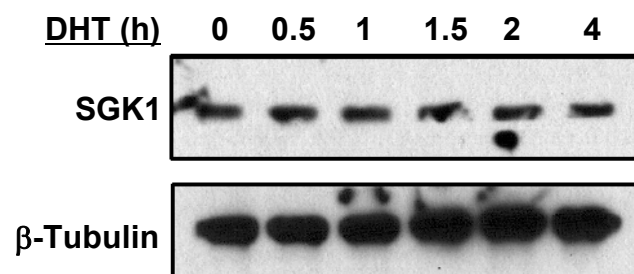

**Figure S8. DHT does not acutely affect SGK1 protein levels.**  
CWR22R3 cells were treated with 10nM DHT for the indicated time and blotted.
